# Supplementary material for: Community recommendations on biobank governance: Results from a deliberative community engagement in California
Source: PLOS journal article supplement (doi:10.1371/journal.pone.0172582), 2017-02-24
Supplement: S4 (10.1371/journal.pone.0172582.s004) [file journal.pone.0172582.s004]

**S3 Table. Deliberant-Generated Recommendations that were Highly Supported Across DCE Sites (Included in Analyses)**

**Los Angeles Recommendations and Votes (Yes/No/Abstain)**

|                                   |                                                                                                                                                     |        |
|-----------------------------------|-----------------------------------------------------------------------------------------------------------------------------------------------------|--------|
| <b>Community governance</b>       |                                                                                                                                                     |        |
| LA1                               | There should be meaningful and transparent involvement of communities in the governance and oversight of biobanks.                                  | 26/0/0 |
| LA2                               | Communities should be represented by a diverse, trustworthy, informed group of the general public.                                                  | 25/1/0 |
| LA3                               | There should be multiple forms of ongoing public education and communication about biobanks and research progress (e.g., newsletters, websites, TV) | 25/1/0 |
| <b>Trustworthy oversight</b>      |                                                                                                                                                     |        |
| LA4                               | Oversight should be conducted by multiple, unbiased stakeholders (e.g., community members, scientists, medical professionals, lawyers)              | 22/2/2 |
| LA5                               | Misuse should be identified through monitoring, and there should be consequences for misuse of samples and patient information.                     | 26/0/0 |
| <b>Sample and data sharing</b>    |                                                                                                                                                     |        |
| LA6                               | UC should support sharing samples and data among researchers for the public good despite the risks, provided there is good ethical governance.      | 25/0/1 |
| LA7                               | Research results should be shared back to research programs and clinical organizations                                                              | 23/2/1 |
| <b>Informed consent</b>           |                                                                                                                                                     |        |
| LA8                               | Consent forms should be clear and use simple language, and permissions should be obtained as early as possible in the process                       | 25/0/1 |
| LA9                               | Consent should be an interactive process with an informed person, when the donor is not stressed.                                                   | 24/1/1 |
| <b>Return of research results</b> |                                                                                                                                                     |        |
| LA10                              | Participants should have a choice upfront about whether to receive results                                                                          | 23/2/1 |

## San Francisco Recommendations and Votes (Yes/No/Abstain)

### Community governance

|     |                                                                                                                                                                                                               |        |
|-----|---------------------------------------------------------------------------------------------------------------------------------------------------------------------------------------------------------------|--------|
| SF1 | The community's role should include increased involvement with the IRB and a community board that provides recommendations to the governing board of the biobank.                                             | 22-0-3 |
| SF2 | The community must have a meaningful role in the oversight of UC biobanks.                                                                                                                                    | 24-0-1 |
| SF3 | The public should be made aware of biobanking and research through education, e.g. videos, events, etc.                                                                                                       | 25-0-0 |
| SF4 | Community representatives should be committed; they should represent California's diversity; membership should rotate; they should be independent of UC and other stakeholders, i.e. pharmaceutical companies | 23-1-1 |

### Trustworthy oversight

|     |                                                                                                                                            |        |
|-----|--------------------------------------------------------------------------------------------------------------------------------------------|--------|
| SF5 | Trustworthy oversight must include the IRB, the biobank, the community, and UC.                                                            | 21-2-2 |
| SF6 | There must be monitoring and consequences for improper handling or use of data or samples, e.g. abuse, mishandling, release of information | 23-1-1 |

### Sample and data sharing

|     |                                                                                                                |        |
|-----|----------------------------------------------------------------------------------------------------------------|--------|
| SF7 | UC should share <b>data</b> among all researchers as long as it advances research and there is good oversight. | 22-2-1 |
| SF8 | UC can share <b>samples</b> among all researchers as long as it advances research and there is good oversight. | 22-1-2 |
| SF9 | If data and samples are shared outside of UC, any information or findings should be shared back to UC.         | 24-0-1 |

### Informed consent

|      |                                                                                                           |        |
|------|-----------------------------------------------------------------------------------------------------------|--------|
| SF10 | Consent forms must be written clearly, simply, in large fonts, and in the donor's preferred language.     | 24-0-1 |
| SF11 | Consent must be obtained by a trusted, knowledgeable person who has time to answer questions.             | 24-1-0 |
| SF12 | Consent for donation must be collected at a time when people are less stressed, worried, or pre-occupied. | 24-0-1 |

### Return of research results

|      |                                                                                                                                 |        |
|------|---------------------------------------------------------------------------------------------------------------------------------|--------|
| SF13 | Receiving individual research results is a personal choice; donors should be allowed to opt-in or opt-out of receiving results. | 24-0-1 |
|------|---------------------------------------------------------------------------------------------------------------------------------|--------|
